# Supplementary material for: 3'-Ethynylcytidine, an RNA polymerase inhibitor, combined with cisplatin exhibits a potent synergistic growth-inhibitory effect via Vaults dysfunction
Source: PubMed Central journal article supplement (PMC4131025; doi:10.1186/1471-2407-14-562), 2014-08-04
Supplement: 12885_2014_4747_MOESM1_ESM.pdf [file 12885_2014_4747_MOESM1_ESM.pdf]

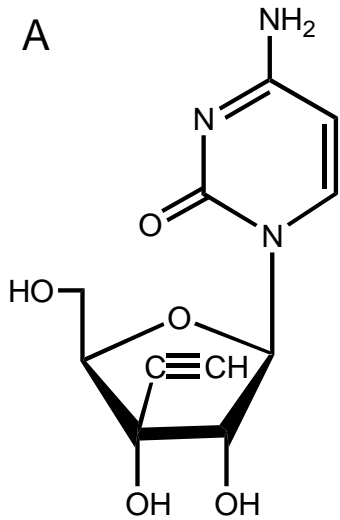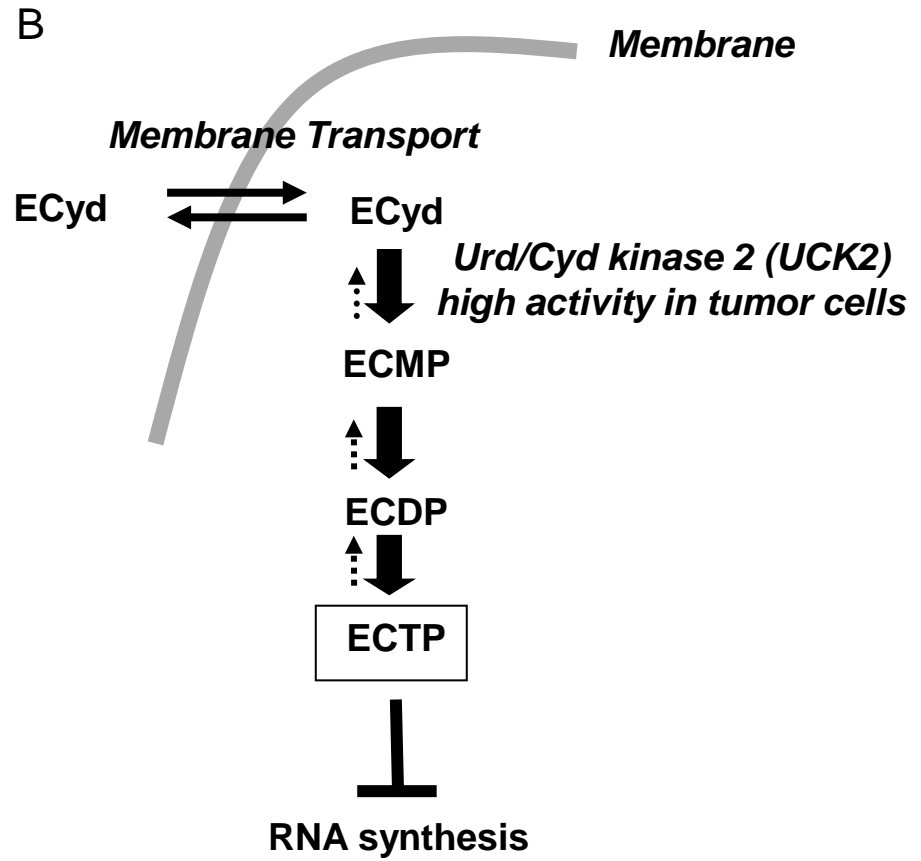

*Supplementary figure S1*

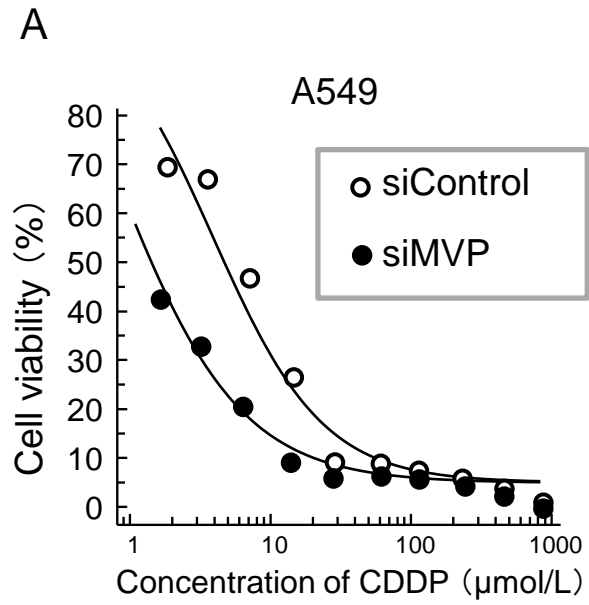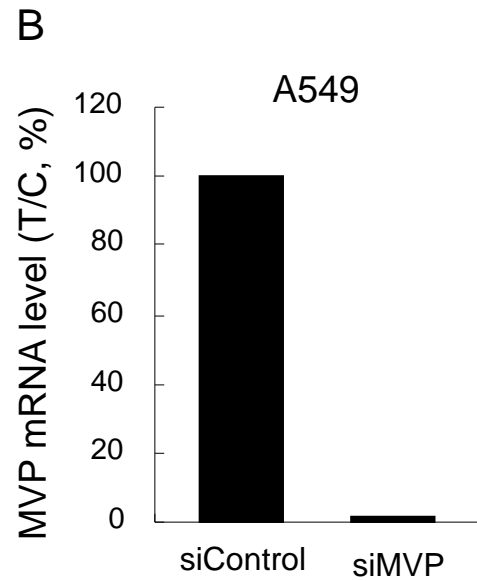

*Supplementary figure S2*

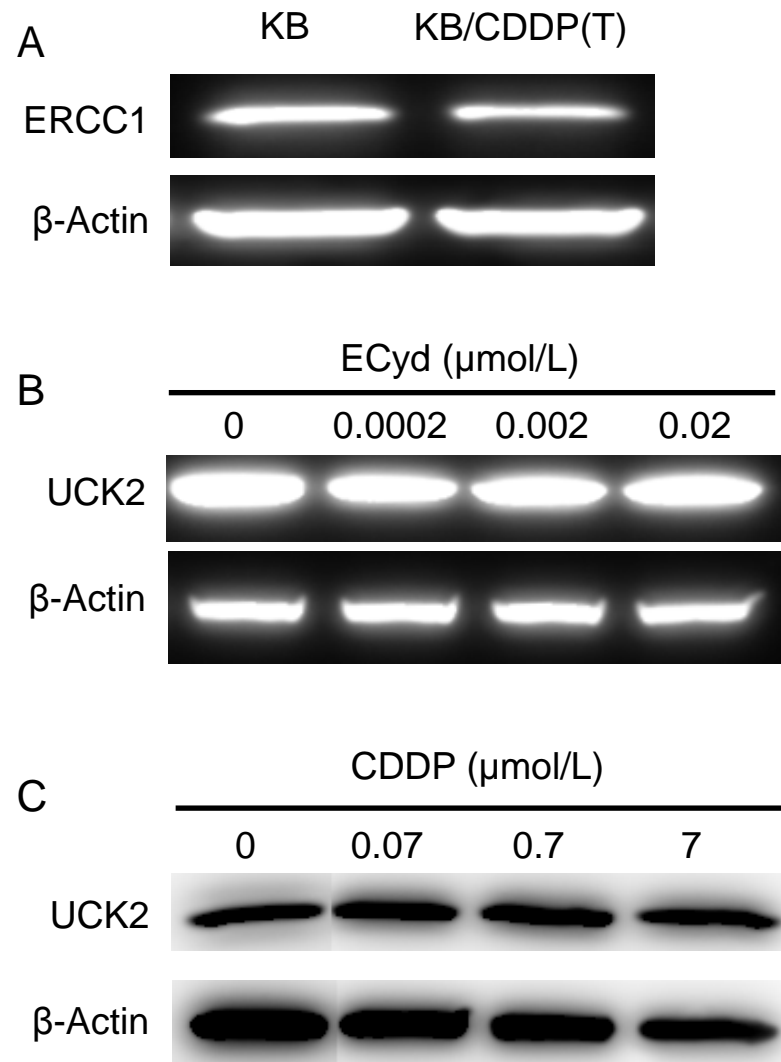

*Supplementary figure S3*

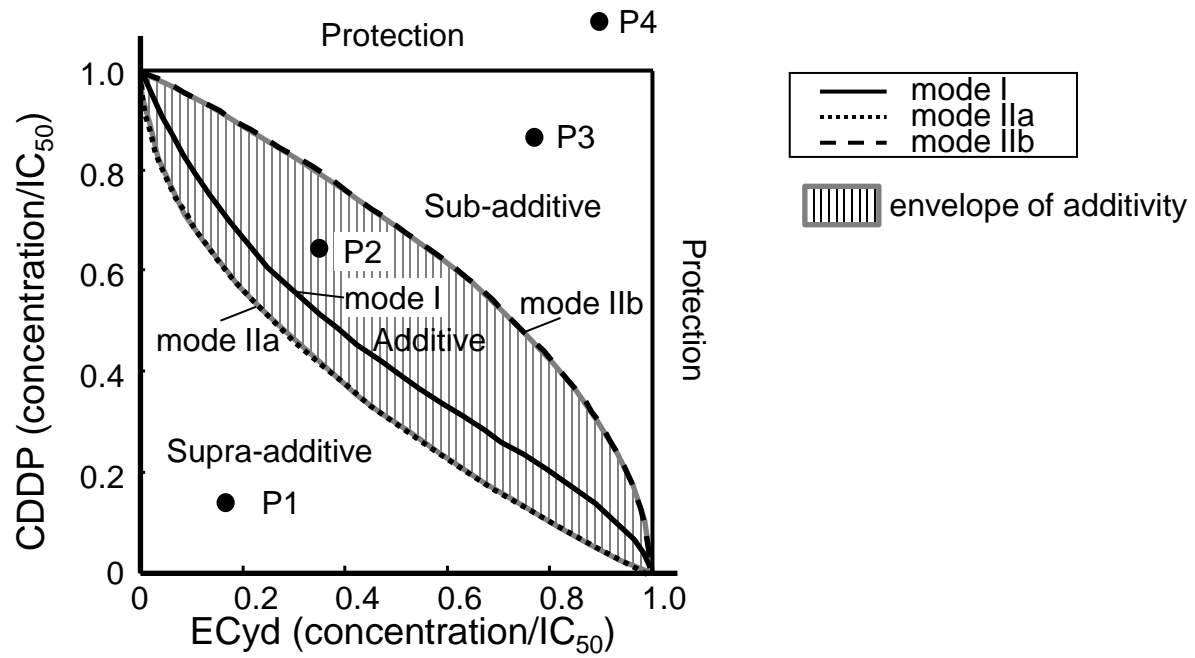

*Supplementary figure S4*

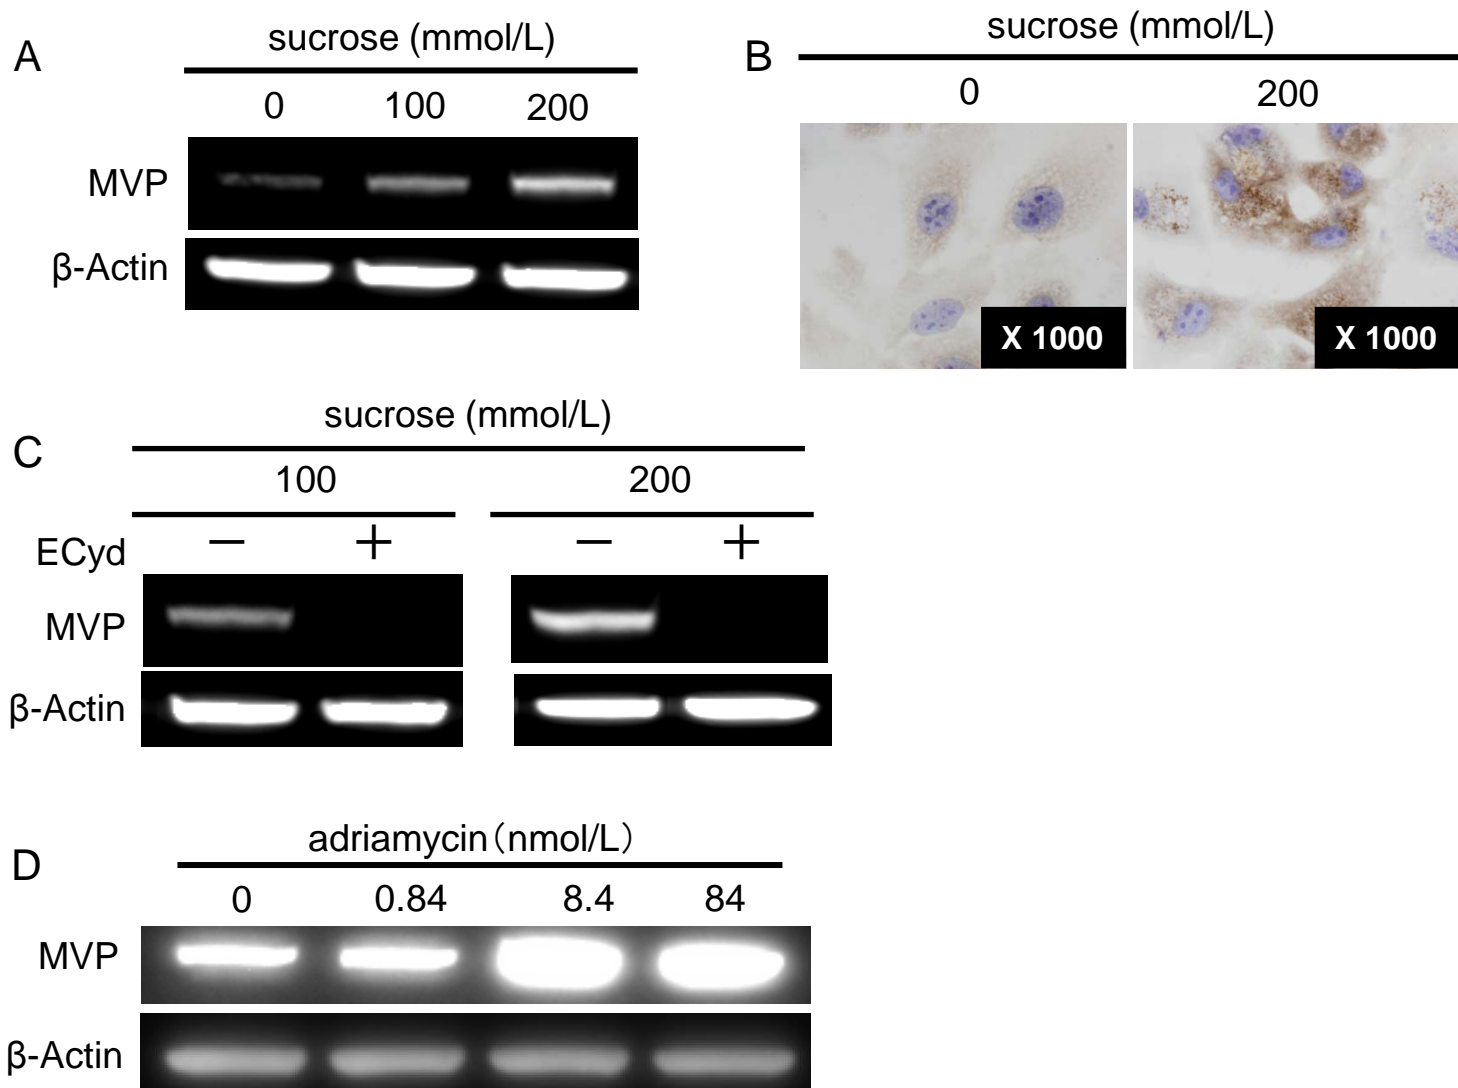

*Supplementary figure S5*
